# Supplementary material for: Three-Dimensional Automated, Machine-Learning-Based Left Heart Chamber Metrics: Associations with Prevalent Vascular Risk Factors and Cardiovascular Diseases
Source: MDPI journal article supplement (doi:10.3390/jcm11247363), 2022-12-12
Supplement: s1 [file s1]

**Table S1.** Characteristics of 22 patients selected for intra- and inter-operator variability assessment.

| <b>Patient ID</b> | <b>Image quality</b> | <b>FR op A (Hz)</b> | <b>FR op B (Hz)</b> | <b>Category</b> |
|-------------------|----------------------|---------------------|---------------------|-----------------|
| <b>1</b>          | Suboptimal           | 19                  | 17                  | CVDs            |
| <b>2</b>          | Suboptimal           | 20                  | 17                  | CVDs            |
| <b>3</b>          | Optimal              | 21                  | 18                  | CVDs            |
| <b>4</b>          | Suboptimal           | 22                  | 22                  | Healthy         |
| <b>5</b>          | Optimal              | 20                  | 19                  | CVDs            |
| <b>6</b>          | Optimal              | 20                  | 20                  | VRFs            |
| <b>7</b>          | Optimal              | 21                  | 21                  | CVDs            |
| <b>8</b>          | Suboptimal           | 19                  | 19                  | CVDs            |
| <b>9</b>          | Optimal              | 20                  | 20                  | VRFs            |
| <b>10</b>         | Suboptimal           | 18                  | 15                  | CVDs            |
| <b>11</b>         | Suboptimal           | 17                  | 17                  | Healthy         |
| <b>12</b>         | Optimal              | 17                  | 20                  | VRFs            |
| <b>13</b>         | Optimal              | 24                  | 25                  | CVDs            |
| <b>14</b>         | Optimal              | 20                  | 20                  | Healthy         |
| <b>15</b>         | Optimal              | 22                  | 21                  | CVDs            |
| <b>16</b>         | Optimal              | 20                  | 20                  | CVDs            |
| <b>17</b>         | Optimal              | 21                  | 21                  | VRFs            |
| <b>18</b>         | Suboptimal           | 19                  | 19                  | CVDs            |
| <b>19</b>         | Optimal              | 19                  | 19                  | Healthy         |
| <b>20</b>         | Optimal              | 19                  | 19                  | Healthy         |
| <b>21</b>         | Optimal              | 19                  | 19                  | Healthy         |
| <b>22</b>         | Optimal              | 21                  | 21                  | Healthy         |

Legend: FR= frame rate; Op A= senior operator; Op B= junior operator.

**Table S2.** Associations between 3D-DHM echocardiographic metrics and vascular risk factors or prevalent cardiovascular disease.

|                                                       | Prevalent VRFs   |         | Prevalent CVDs   |         |
|-------------------------------------------------------|------------------|---------|------------------|---------|
|                                                       | aOR* [95 % CI]   | p value | aOR* [95% CI]    | p value |
| <b>Echocardiographic metrics</b>                      |                  |         |                  |         |
| <b>EDVi 3D (per 10 ml/m<sup>2</sup>)</b>              | 0.98 [0.85-1.13] | 0.79    | 1.44 [1.33-1.57] | <0.001  |
| <b>ESVi 3D, (per 10 ml/m<sup>2</sup>)</b>             | 1.02 [0.76-1.35] | 0.90    | 2.31 [1.97-2.71] | <0.001  |
| <b>LVEF 3D (per 10%)</b>                              | 0.92 [0.63-1.34] | 0.65    | 0.28 [0.22-0.35] | <0.001  |
| <b>LAEF 3D (per 10%)</b>                              | 0.94 [0.77-1.15] | 0.58    | 0.45 [0.39-0.51] | <0.001  |
| <b>LV mass/m<sup>2</sup> (per 10 g/m<sup>2</sup>)</b> | 1.03 [0.90-1.18] | 0.58    | 1.50 [1.37-1.64] | <0.001  |
| <b>LAVi, max (per 10 ml/m<sup>2</sup>)</b>            | 1.15 [0.96-1.38] | 0.11    | 1.73 [1.55-1.94] | <0.001  |
| <b>LAVi min (per 10 ml/m<sup>2</sup>)</b>             | 1.19 [0.87-1.63] | 0.26    | 3.03 [2.48-3.70] | <0.001  |
| <b>SVi (per 10 ml/m<sup>2</sup>)</b>                  | 0.94 [0.75-1.17] | 0.61    | 0.95 [0.82-1.09] | 0.49    |
| <b>LVGF index (per 10%)</b>                           | 0.77 [0.51-1.19] | 0.25    | 0.22 [0.16-0.28] | <0.001  |
| <b>LVM/LVEDV ratio</b>                                | 1.91 [0.59-6.16] | 0.27    | 0.83 [0.39-1.73] | 0.61    |

Legend: \*Adjusted analysis for sex and age; EDVi= end-diastolic volume indexed; ESVi= end-systolic volume indexed; LAEF= left atrial ejection fraction; LAVi= left atrial volume indexed; LVEF= left ventricular ejection fraction, LVGFI= left ventricle global function index, LVM= left ventricular mass, Svi= stroke volume indexed.

**Table S3.** Intra- (A) and inter-operator (B) reliability assessed by Bland-Altman analysis, Interclass Correlation Coefficients, and Coefficients of Variance.

**A**

|                | <b>Bias</b> | <b>LOA</b> | <b>ICC</b> | <b>CoV</b> |
|----------------|-------------|------------|------------|------------|
| <b>EDV</b>     | 1.5         | 14.9       | 99.5%      | 2.5 ± 2.1% |
| <b>ESV</b>     | -0.5        | 5.6        | 99.8%      | 2.4 ± 1.8% |
| <b>LVEF-3D</b> | 0.5         | 4.0        | 97.8%      | 2.1 ± 1.5% |
| <b>SV</b>      | 1.9         | 13.4       | 98.4%      | 4.1 ± 3%   |
| <b>LAVmax</b>  | 2.1         | 21.1       | 93.6%      | 5.9 ± 6.5% |
| <b>LAVmin</b>  | 0.4         | 11.8       | 95.7%      | 8.1 ± 6.2% |
| <b>LAEF</b>    | -0.4        | 13.7       | 86.2%      | 7.1 ± 6.3% |

**B**

|                | <b>Bias</b> | <b>LOA</b> | <b>ICC</b> | <b>CoV</b>  |
|----------------|-------------|------------|------------|-------------|
| <b>EDV</b>     | 5.0         | 25.6       | 98.8%      | 4.3% ± 3.7% |
| <b>ESV</b>     | 1.0         | 15.4       | 99.2%      | 5.2% ± 3.8% |
| <b>LVEF-3D</b> | 0.9         | 8.1        | 95.4%      | 4.6 ± 3.6%  |
| <b>SV</b>      | 5.0         | 26.2       | 92.2%      | 8.2 ± 4.5%  |
| <b>LAVmax</b>  | 3.7         | 18.0       | 94.9%      | 7.2 ± 6.1%  |
| <b>LAVmin</b>  | 3.4         | 10.9       | 92.9%      | 11.3 ± 6.3% |
| <b>LAEF</b>    | -1.7        | 14.1       | 82.5%      | 6.5 ± 7.1%  |

Legend: CoV= Coefficient of variance; EDV= end-diastolic volume; ESV= end-systolic volume; ICC= Interclass correlation coefficients; LAEF= left atrial ejection fraction; LAV= left atrial volume; LOA= limits of agreement; LVEF= left ventricular ejection fraction, LVGFI= left ventricle global function index, LVM= left ventricular mass, SV= stroke volume.

**Figure S1.** 3D-DHM Echocardiographic metrics stratified according to the presence of VRF and CVDs.

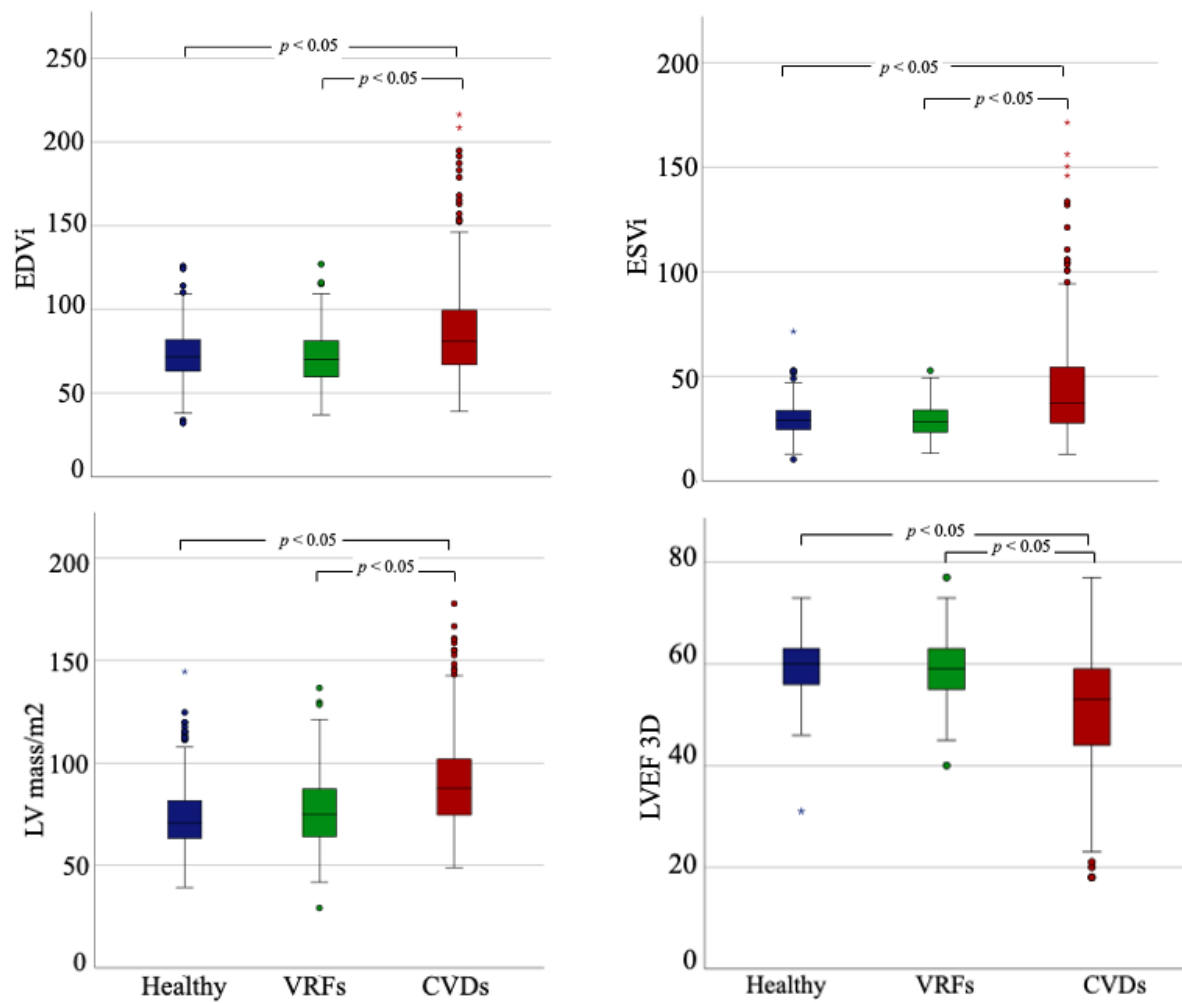

Legend: EDVi= end-diastolic volume indexed; ESVi= end-systolic volume indexed; LVEF= left ventricular ejection fraction.

**Figure S2.** Intra-operator variability assessed by Pearson's correlation and Bland-Altman Plot.

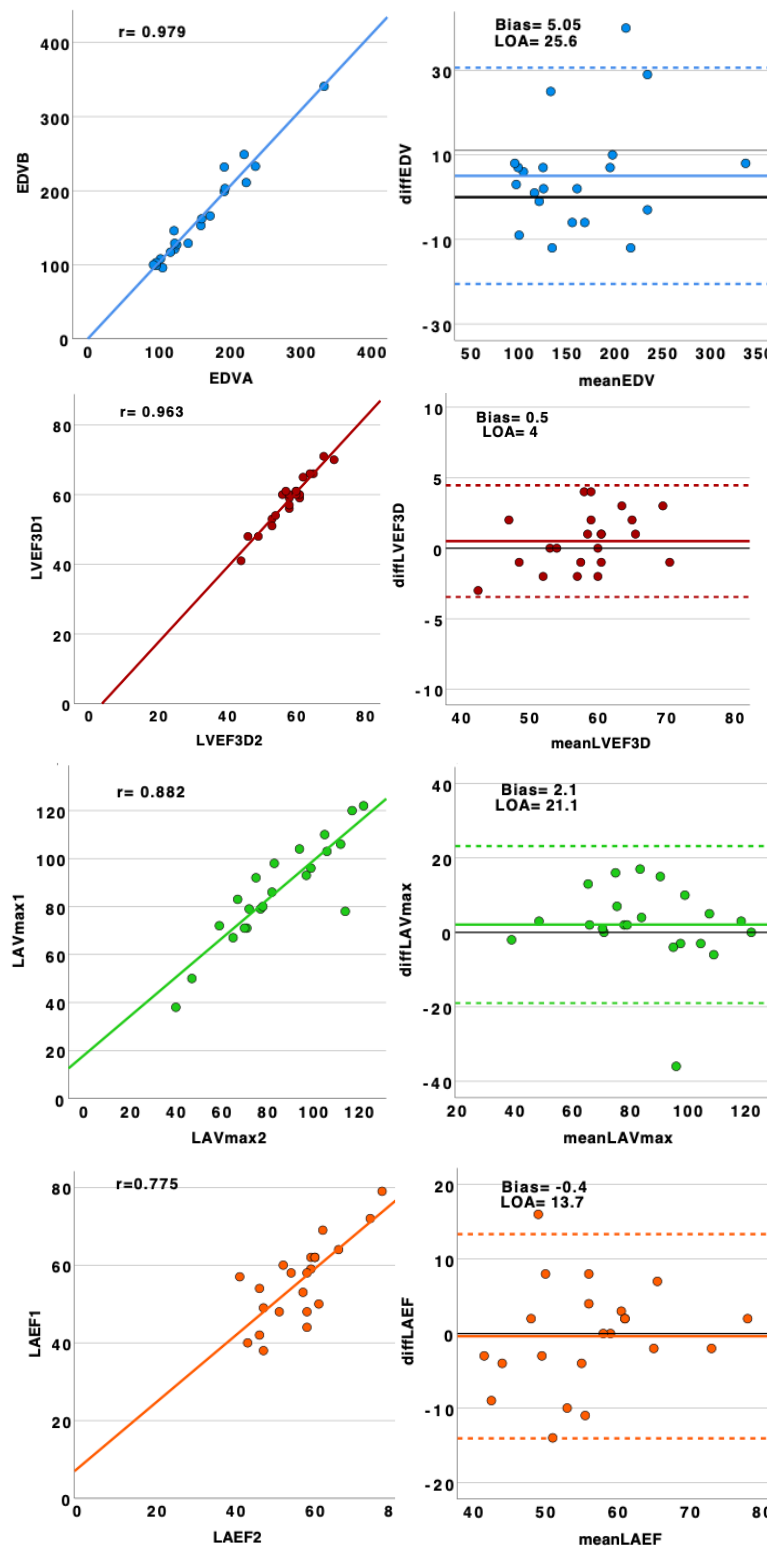

Legend: EDV= end-diastolic volume; LAEF= left atrial ejection fraction; LAV= left atrial volume; LVEF= left ventricular ejection fraction.

**Figure S3:** Inter-operator variability assessed by Pearson's correlation and Bland-Altman Plot.

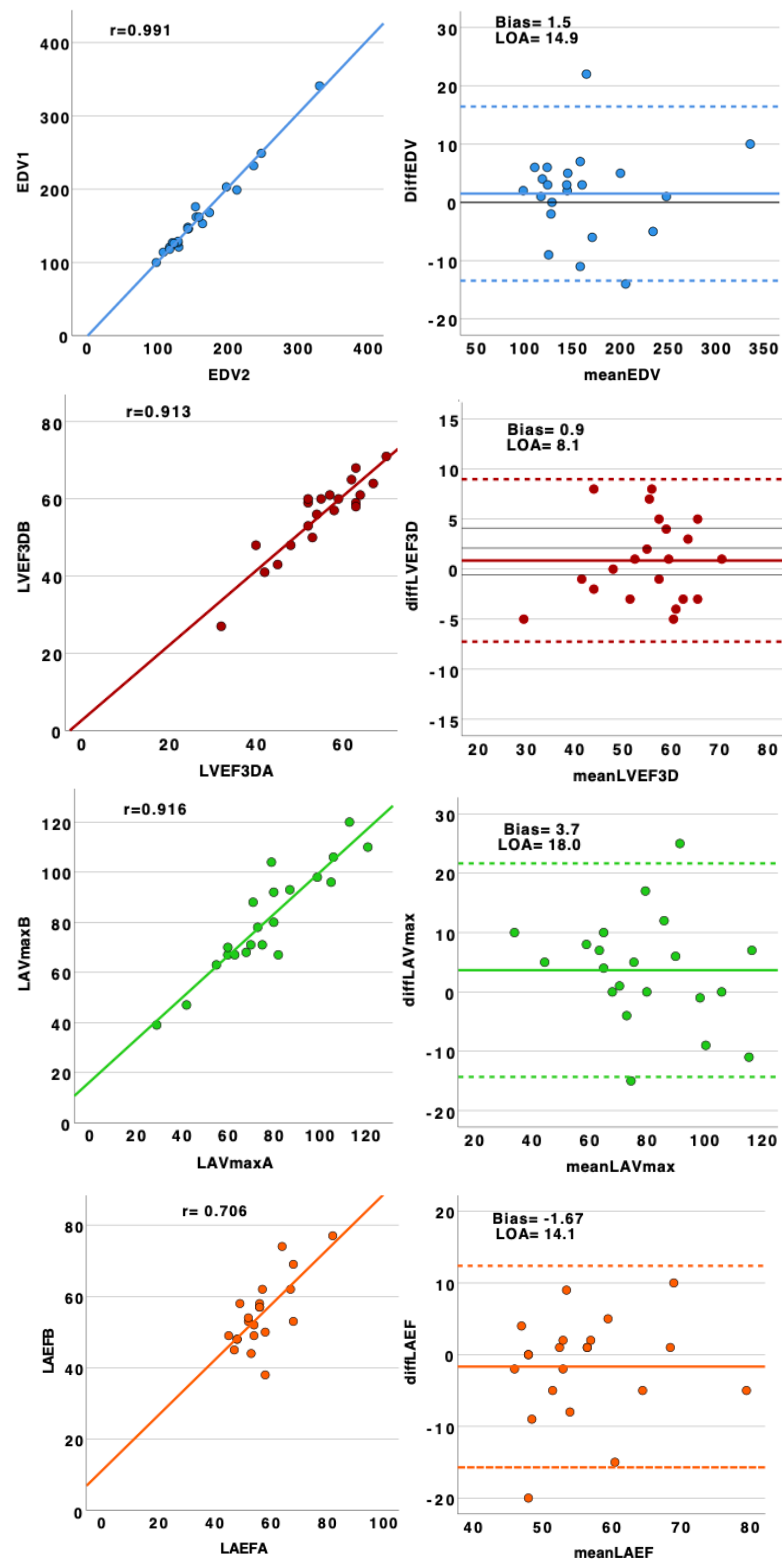

Legend: EDV= end-diastolic volume; LAEF= left atrial ejection fraction; LAV= left atrial volume; LVEF= left ventricular ejection fraction.
